# Supplementary material for: Lack of Association of CD55 Receptor Genetic Variants and Severe Malaria in Ghanaian Children
Source: G3 (Bethesda). 2017 Jan 18;7(3):859–64. doi: 10.1534/g3.116.036475 (PMC5345716; doi:10.1534/g3.116.036475)
Supplement: Supplementary file 1 [file 859FigureS1.docx]

Figure S1 Linkage disequilibrium structure at *CD55* gene locus


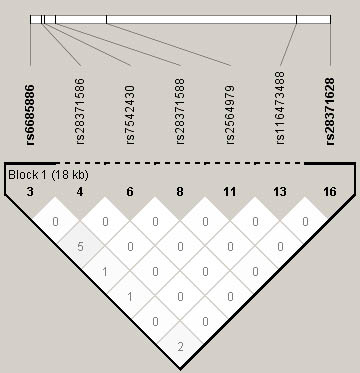


LD pattern is represented by pairwise r2 values between SNPs with MAF>1% based on genotypes of 831 severe malaria cases and 903 controls. r2 values (x100) for each comparison is given in the squares. White squares represent r2 values equal to 0. Squares that are shades of grey represent values between 0 and 1.
