# Supplementary material for: Lack of Association of CD55 Receptor Genetic Variants and Severe Malaria in Ghanaian Children
Source: G3 (Bethesda). 2017 Jan 18;7(3):859–64. doi: 10.1534/g3.116.036475 (PMC5345716; doi:10.1534/g3.116.036475)
Supplement: Supplementary file 3 [file 859TableS2.docx]

Table S2 Oligonucleotides and PCR conditions for *CD55* SNP genotyping

|  | rs_ID | Oligonucleotides | Annealing temperature | Additional or deviant reagents in 10 μl reaction |
| --- | --- | --- | --- | --- |
| 1 | rs6685886 | | rs6685886-F aggctatttattctaaagggtttgtaac | | --- | | rs6685886-R tttacgaaagacaccactttgggattac | | rs6685886-A gtttgtttttattgttatcccacccc-6FAM | | rs6685886-S BMN5-caccgccccgag-Spacer C3 | | 60°C | 2 mM MgCl2, 5 µg BSA  1x Solis Solution S |
| 2 | rs28371586 | | rs28371586-F | TGTTTACGTAGCGAGGAGATATTTAGG | | --- | --- | | rs28371586-R | GCAATACCAGTTAAATGAGTGCTTTGG | | rs28371586-A | Cy5-ACCCGTCTTGTTTGTCCC-Spacer-C3 | | rs28371586-S | ACAACAAACCCCTACTC-Fluorescein | | 52°C | 2.0 mM MgCl2, 5 µg BSA  1x Solis Solution S |
| 3 | rs7542439 | | rs7542430-F | CCCAAAGCACTCATTTAACTGGTATTG | | --- | --- | | rs7542430-R | CTCCCTTTCGATTTTGCCAGGCTTG | | rs7542430-A | CTTGTTCTAACCCGGCGCG-Fluorescein | | rs7542430-S | Cy5-CATGACCGTCGCG-Spacer-C3 | | 58°C | 2.0 mM MgCl2, 5 µg BSA  1x Solis Solution S |
